# Supplementary material for: Copper(ii) mediated phenol ring nitration by nitrogen dioxide
Source: Royal Society of Chemistry journal article supplement (doi:10.1039/c5dt02318a), 2015-01-01
Supplement: c5dt02318a1.pdf [file c5dt02318a1.pdf]

## Supporting information

for

### Copper(II) mediated phenol ring nitration by nitrogen dioxide

Vikash Kumar,<sup>a</sup> Somnath Ghosh,<sup>a</sup> Anoop Kumar Saini,<sup>b</sup> Shaikh M. Mobin,<sup>b</sup> Biplab Mondal<sup>a,\*</sup>

<sup>a</sup>*Department of Chemistry, Indian Institute of Technology Guwahati, Assam 781039, India*

<sup>b</sup>*Department of Chemistry, Indian Institute of Technology Indore, Indore 452017, India*

### Table of contents

| Sl. No. | Description                                                                                                                                       | Page No. |
|---------|---------------------------------------------------------------------------------------------------------------------------------------------------|----------|
| 1       | <b>Figure S1:</b> FT-IR spectrum of ligand <b>L<sup>1</sup>H<sub>2</sub></b> in KBr pellet.                                                       | 3        |
| 2       | <b>Figure S2:</b> <sup>1</sup> H-NMR spectrum of ligand <b>L<sup>1</sup>H<sub>2</sub></b> in CDCl <sub>3</sub> .                                  | 3        |
| 3       | <b>Figure S3:</b> <sup>13</sup> C-NMR spectrum of ligand <b>L<sup>1</sup>H<sub>2</sub></b> in CDCl <sub>3</sub> .                                 | 4        |
| 4       | <b>Figure S4:</b> ESI mass spectrum of ligand <b>L<sup>1</sup>H<sub>2</sub></b> in methanol.                                                      | 4        |
| 5       | <b>Figure S5:</b> FT-IR spectrum of complex <b>1</b> in KBr pellet.                                                                               | 5        |
| 6       | <b>Figure S6:</b> UV-visible spectrum of complex <b>1</b> in methanol.                                                                            | 5        |
| 7       | <b>Figure S7:</b> X-Band EPR spectrum of complex <b>1</b> in dry THF at 77 K.                                                                     | 6        |
| 8       | <b>Figure S8:</b> ORTEP diagram of complex <b>1</b> (50% thermal ellipsoid plot, hydrogen atoms and solvent molecules are omitted for clarity).   | 6        |
| 9       | <b>Figure S9:</b> X-Band EPR spectrum of complex <b>1</b> (black), phenoxy radical intermediate (blue) and complex <b>3</b> (red) at 77 K in THF. | 8        |
| 10      | <b>Figure S10:</b> FT-IR spectrum of complex <b>3</b> in KBr pellet.                                                                              | 9        |
| 11      | <b>Figure S11:</b> UV-visible spectrum of complex <b>3</b> in methanol at room temperature.                                                       | 9        |

|    |                                                                                                                                                     |    |
|----|-----------------------------------------------------------------------------------------------------------------------------------------------------|----|
| 12 | <b>Figure S12:</b> X-Band EPR spectrum of complex <b>5</b> in methanol at room temperature.                                                         | 10 |
| 13 | <b>Figure S13:</b> FT-IR spectrum of ligand <b>L<sup>2</sup>H<sub>2</sub></b> in KBr pellet.                                                        | 10 |
| 14 | <b>Figure S14:</b> <sup>1</sup> H-NMR spectrum of ligand <b>L<sup>2</sup>H<sub>2</sub></b> in CDCl <sub>3</sub> .                                   | 11 |
| 15 | <b>Figure S15:</b> <sup>13</sup> C-NMR spectrum of ligand <b>L<sup>2</sup>H<sub>2</sub></b> in CDCl <sub>3</sub> .                                  | 11 |
| 16 | <b>Figure S16:</b> ESI mass spectrum of ligand <b>L<sup>2</sup>H<sub>2</sub></b> in methanol                                                        | 12 |
| 17 | <b>Figure S17:</b> FT-IR spectrum of complex <b>2</b> in KBr pellet.                                                                                | 12 |
| 18 | <b>Figure S18:</b> UV-visible spectra of complex <b>2</b> in different solvents.                                                                    | 13 |
| 19 | <b>Figure S19:</b> X-Band EPR spectrum of complex <b>2</b> in THF at 77 K.                                                                          | 13 |
| 20 | <b>Figure S20:</b> X-Band EPR spectrum of complex <b>2</b> (black) and phenoxyl radical intermediate (blue) in THF at 77 K.                         | 14 |
| 21 | <b>Figure S21:</b> X-Band EPR spectrum of complex <b>2</b> (black), phenoxyl radical intermediate (blue) and complex <b>4</b> (red) in THF at 77 K. | 14 |
| 22 | <b>Figure S22:</b> UV-visible spectra of complex <b>2</b> (red ), phenoxyl radical (black ) and final product (violet) in THF at -80 °C.            | 15 |
| 23 | <b>Figure S23:</b> FT-IR spectrum of complex <b>4</b> in KBr pellet.                                                                                | 15 |
| 24 | <b>Figure S24:</b> UV-visible spectrum of complex <b>4</b> in methanol at room temperature.                                                         | 16 |
| 25 | <b>Figure S25:</b> X-Band EPR spectrum of complex <b>4</b> in methanol at room temperature.                                                         | 16 |
| 26 | <b>Figure S26:</b> ESI mass spectrum of complex <b>4</b> in methanol.                                                                               | 17 |
| 27 | <b>Figure S27:</b> UV-visible spectra of NO <sub>2</sub> purged in THF at -80 °C.                                                                   | 17 |
|    |                                                                                                                                                     |    |

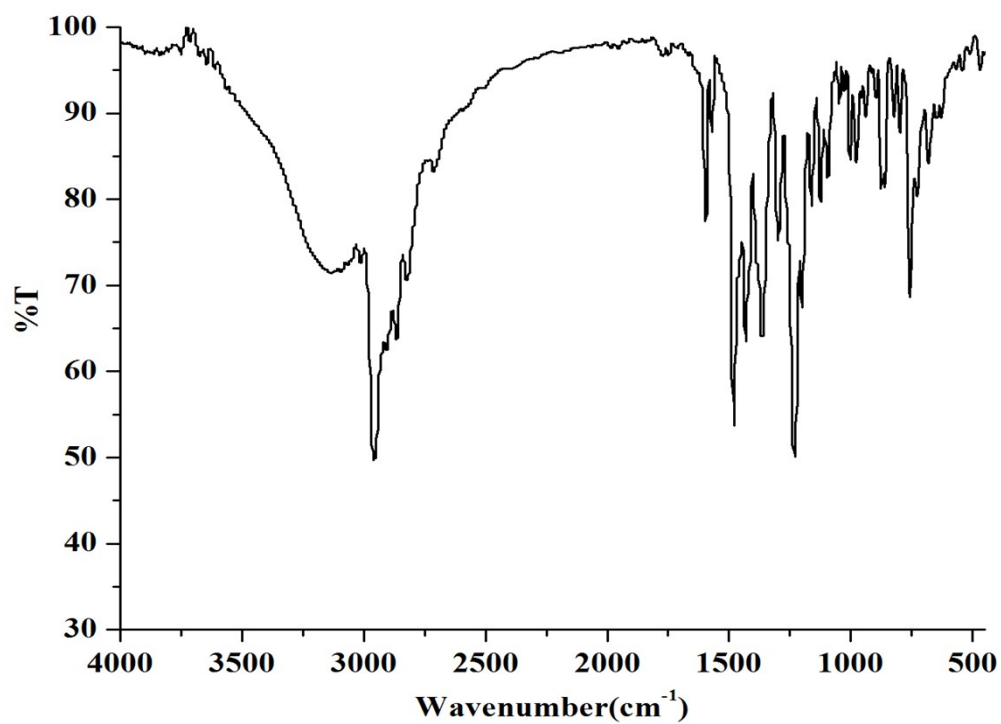

**Figure S1:** FT-IR spectrum of ligand L<sup>1</sup>H<sub>2</sub> in KBr pellet.

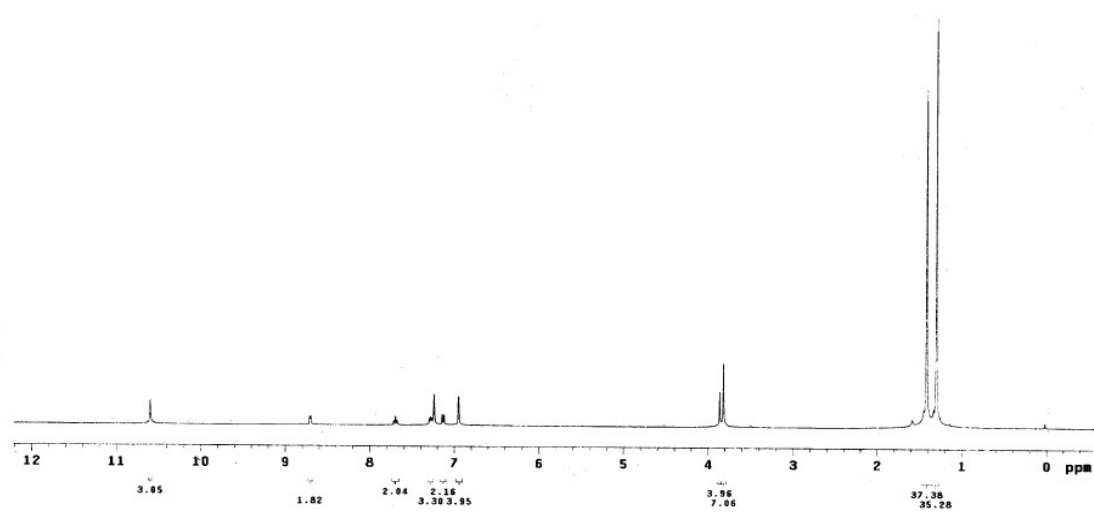

**Figure S2:** <sup>1</sup>H-NMR spectrum of ligand L<sup>1</sup>H<sub>2</sub> in CDCl<sub>3</sub>.

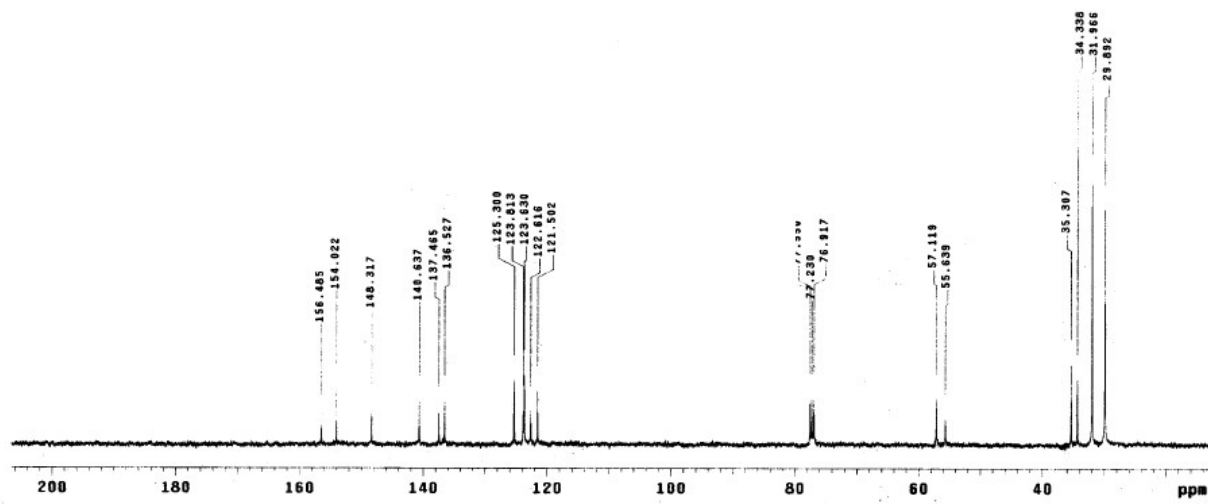

**Figure S3:**  $^{13}\text{C}$ -NMR spectrum of ligand  $\text{L}^1\text{H}_2$  in  $\text{CDCl}_3$ .

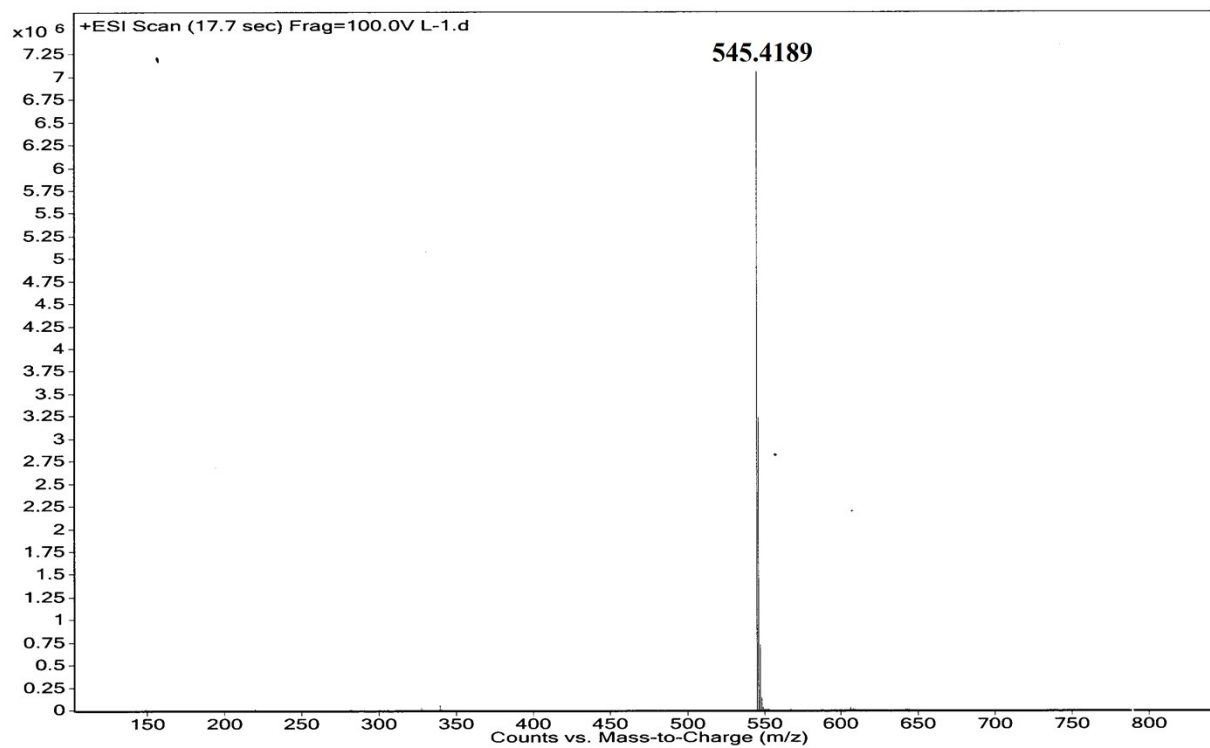

**Figure S4:** ESI mass spectrum of ligand  $\text{L}^1\text{H}_2$  in methanol.

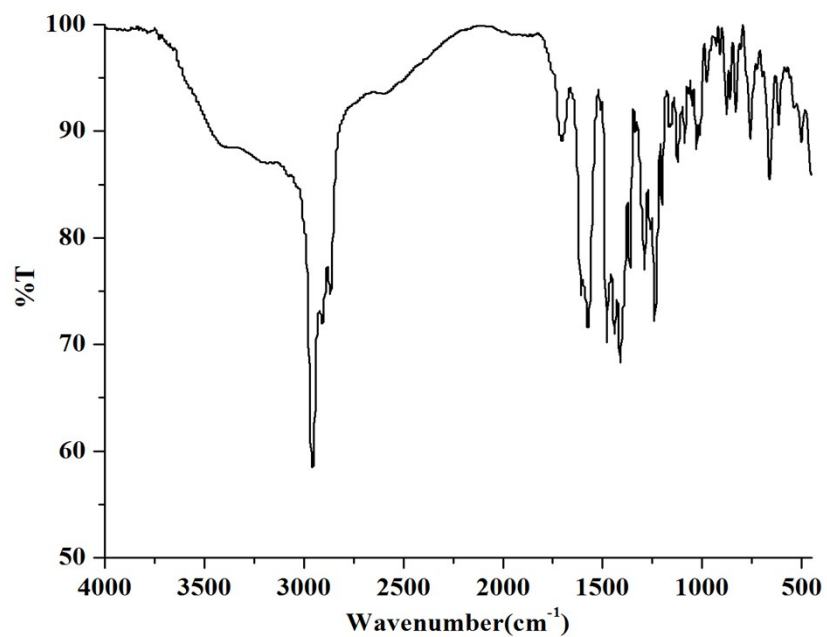

**Figure S5:** FT-IR spectrum of complex 1 in KBr pellet.

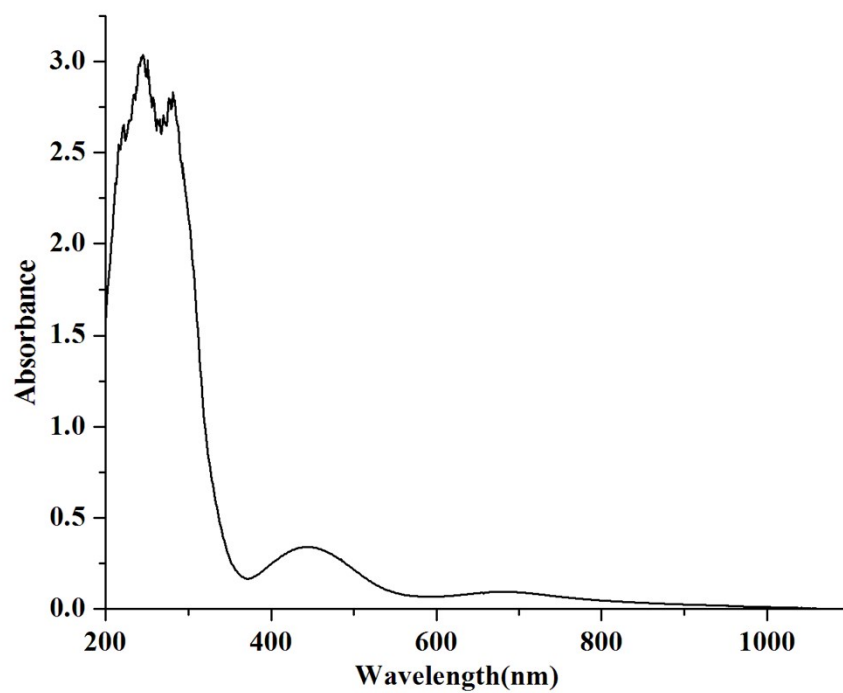

**Figure S6:** UV-visible spectrum of complex 1 in methanol.

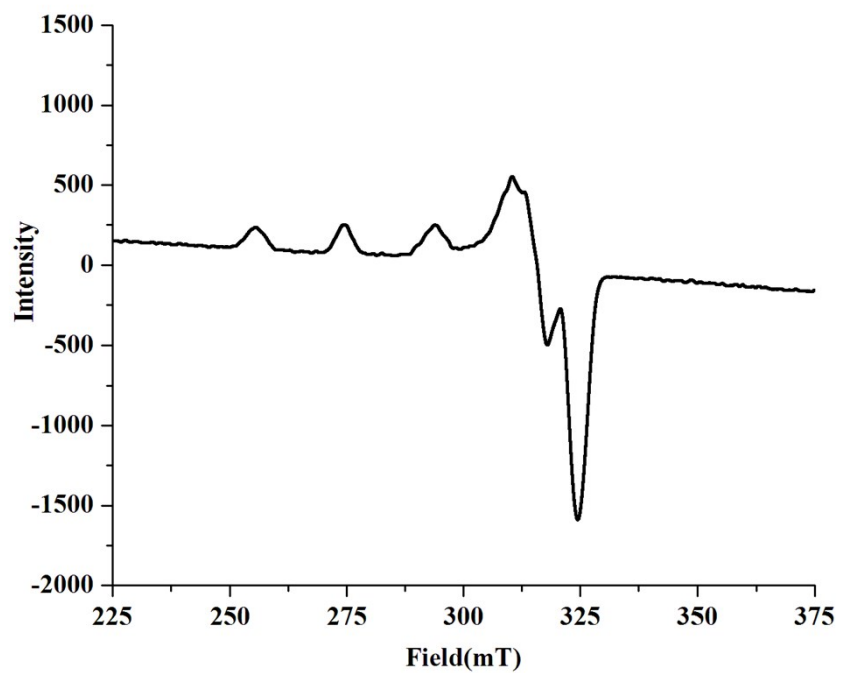

**Figure S7:** X-Band EPR spectrum of complex **1** in THF at 77 K.

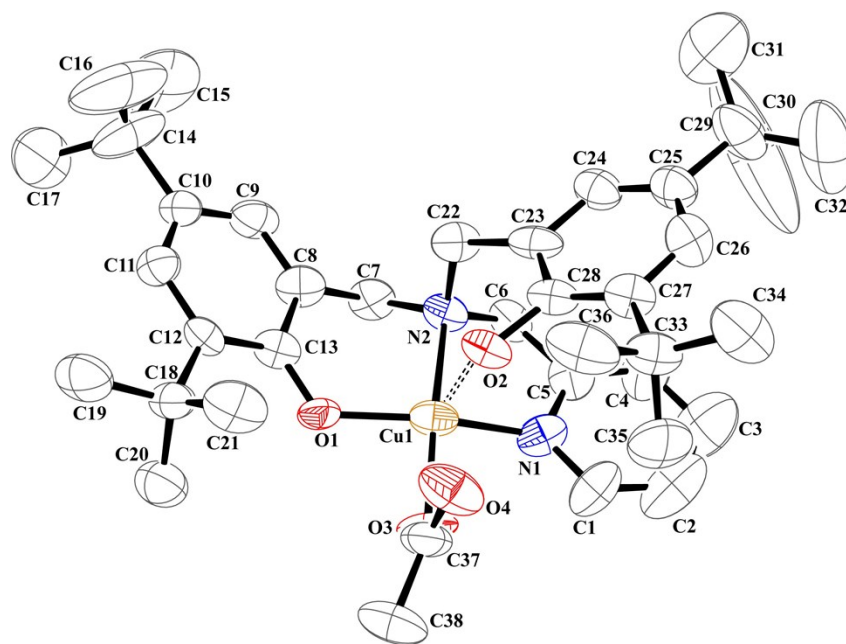

**Figure S8:** ORTEP diagram of complex **1** (50% thermal ellipsoid plot, hydrogen atoms and solvent molecules are omitted for clarity).

**Table S1:** Crystallographic table for complex 1.

|                                        | Complex 1                                                        |
|----------------------------------------|------------------------------------------------------------------|
| Formulae                               | C <sub>39</sub> H <sub>57</sub> N <sub>2</sub> O <sub>5</sub> Cu |
| Mol. wt.                               | 697.41                                                           |
| Crystal system                         | Monoclinic                                                       |
| Space group                            | P21/n                                                            |
| Temperature /K                         | 296(2)                                                           |
| Wavelength /Å                          | 0.71073                                                          |
| <i>a</i> /Å                            | 26.8261(11)                                                      |
| <i>b</i> /Å                            | 10.7728(4)                                                       |
| <i>c</i> /Å                            | 27.9227(17)                                                      |
| $\alpha$ /°                            | 90.00                                                            |
| $\beta$ /°                             | 96.304(4)                                                        |
| $\gamma$ /°                            | 90.00                                                            |
| <i>V</i> / Å <sup>3</sup>              | 8020.6(7)                                                        |
| <i>Z</i>                               | 8                                                                |
| Density/Mgm <sup>-3</sup>              | 1.155                                                            |
| Abs. co-eff. /mm <sup>-1</sup>         | 0.585                                                            |
| Abs. correction                        | multi-scan                                                       |
| F(000)                                 | 2992                                                             |
| Total no. of reflections               | 18185                                                            |
| Reflections, <i>I</i> > 2σ( <i>I</i> ) | 7961                                                             |
| Max. 2θ/°                              | 28.75                                                            |
| Ranges (h, k, l)                       | -34 ≤ h ≤ 35<br>-14 ≤ k ≤ 13<br>-37 ≤ l ≤ 33                     |
| Complete to 2θ (%)                     | 87.2                                                             |
| Refinement method                      | Full-matrix least-squares on <i>F</i> <sup>2</sup>               |
| Goof ( <i>F</i> <sup>2</sup> )         | 1.270                                                            |
| R indices [ <i>I</i> > 2σ( <i>I</i> )] | 0.1204                                                           |
| R indices (all data)                   | 0.2014                                                           |

**Table S2:** Selected bond angles (°) for complex 1.

| Atoms         | Angles (°) | Atoms         | Angles (°) |
|---------------|------------|---------------|------------|
| N1 - Cu1 - N2 | 83.7(2)    | O2 - Cu1 - O3 | 95.1(2)    |
| N1 - Cu1 - O1 | 162.8(2)   | Cu1 - N1 - C5 | 115.3(4)   |
| N1 - Cu1 - O2 | 90.9(2)    | Cu1 - N1 - C1 | 126.3(5)   |

|               |          |                |          |
|---------------|----------|----------------|----------|
| N1 - Cu1 - O3 | 93.8(2)  | Cu1 - N2 - C7  | 107.8(4) |
| N2 - Cu1 - O1 | 94.5(2)  | Cu1 - N2 - C22 | 111.8(4) |
| N2 - Cu1 - O2 | 86.7(2)  | Cu1 - O1 - C13 | 127.9(4) |
| N2 - Cu1 - O3 | 177.0(2) | Cu1 - O3 - C37 | 126.3(5) |
| O1 - Cu1 - O2 | 106.1(2) | Cu1 - N2 - C6  | 106.8(4) |
| O1 - Cu1 - O3 | 87.4(2)  | -              | -        |

**Table S3:** Selected bond distances (Å) for complex **1** and **5**.

| Atoms    | Distances (Å) | Atoms    | Distances (Å) |
|----------|---------------|----------|---------------|
| Cu1 - N1 | 1.993(5)      | O3 - C37 | 1.25(1)       |
| Cu1 - N2 | 2.047(4)      | N1 - C1  | 1.340(9)      |
| Cu1 - O1 | 1.900(4)      | N2 - C7  | 1.498(8)      |
| Cu1 - O2 | 2.404(5)      | N2 - C6  | 1.485(8)      |
| Cu1 - O3 | 1.959(4)      | N2 - C22 | 1.47(1)       |
| N1 - C5  | 1.342(8)      | O1 - C13 | 1.335(8)      |
| C8 - C7  | 1.506(9)      | O2 - C28 | 1.348(9)      |

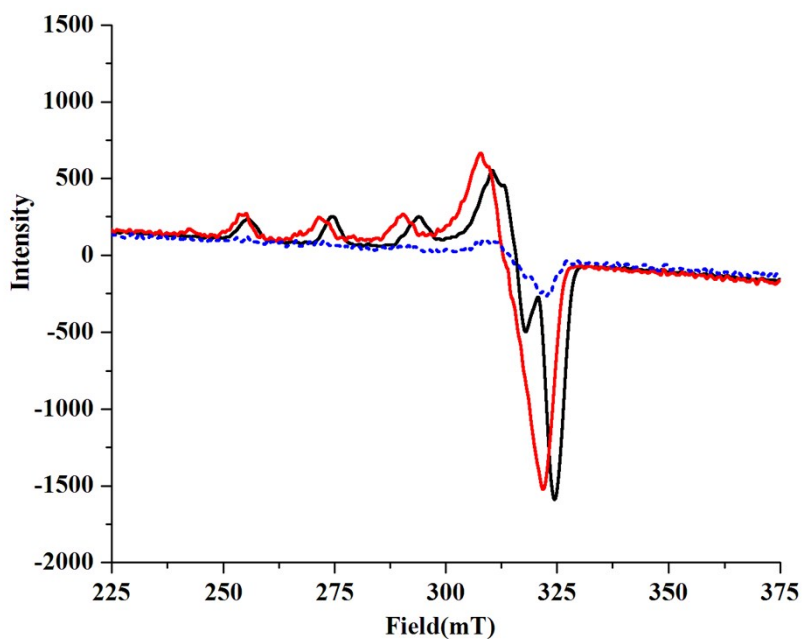

**Figure S9:** X-Band EPR spectrum of complex **1** (black trace), phenoxyl radical intermediate (blue trace) and complex **3** (red trace) in THF at 77 K.



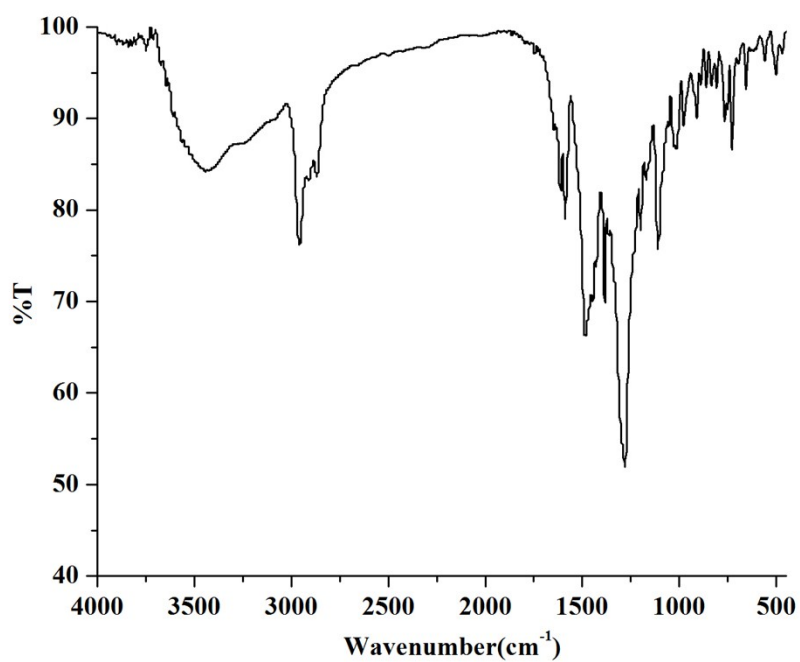

**Figure S10:** FT-IR spectrum of complex **3** in KBr pellet.

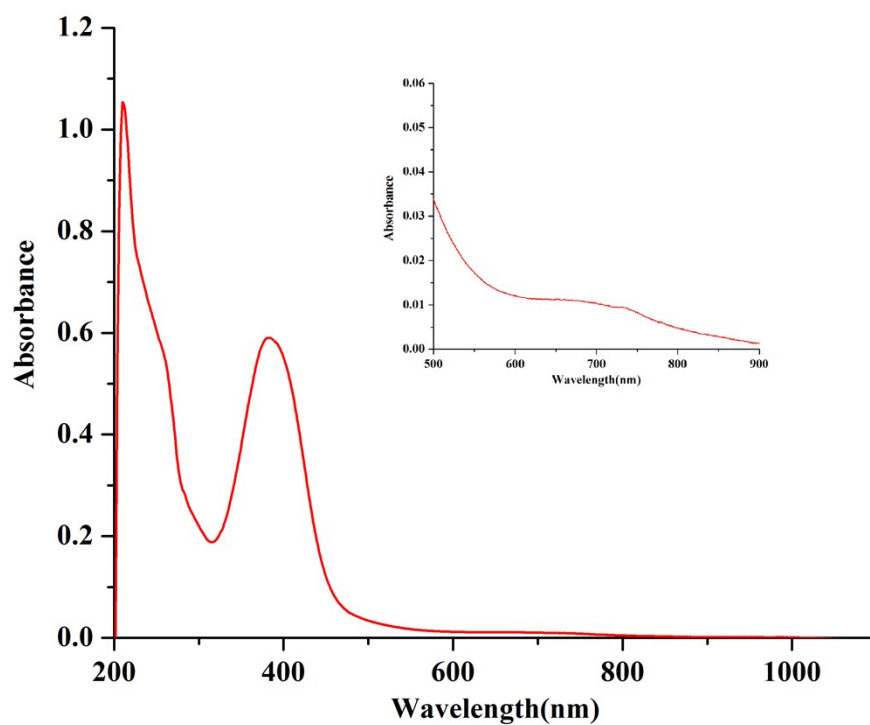

**Figure S11:** UV-visible spectrum of complex **3** in methanol at room temperature.

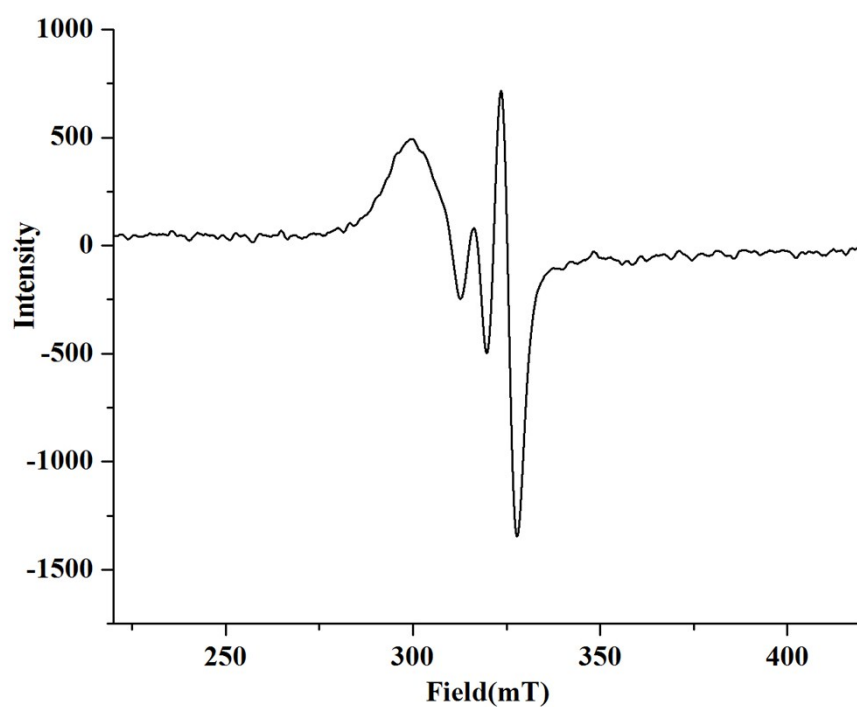

**Figure S12:** X-Band EPR spectrum of complex **5** in methanol at room temperature.

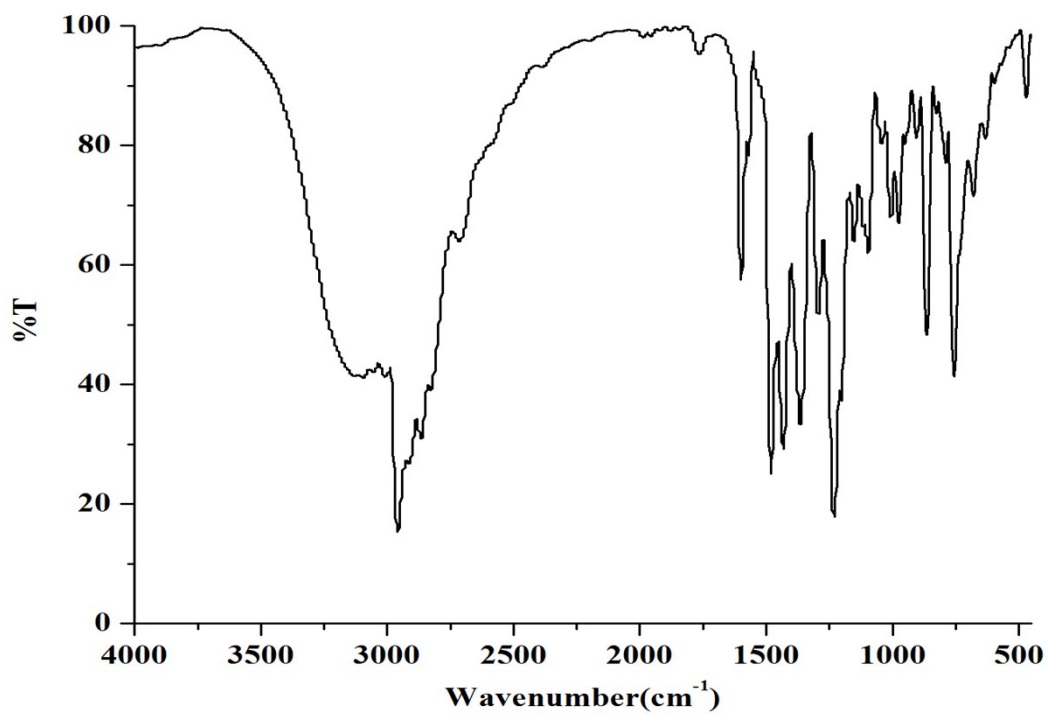

**Figure S13:** FT-IR spectrum of ligand **L<sup>2</sup>H<sub>2</sub>** in KBr pellet.

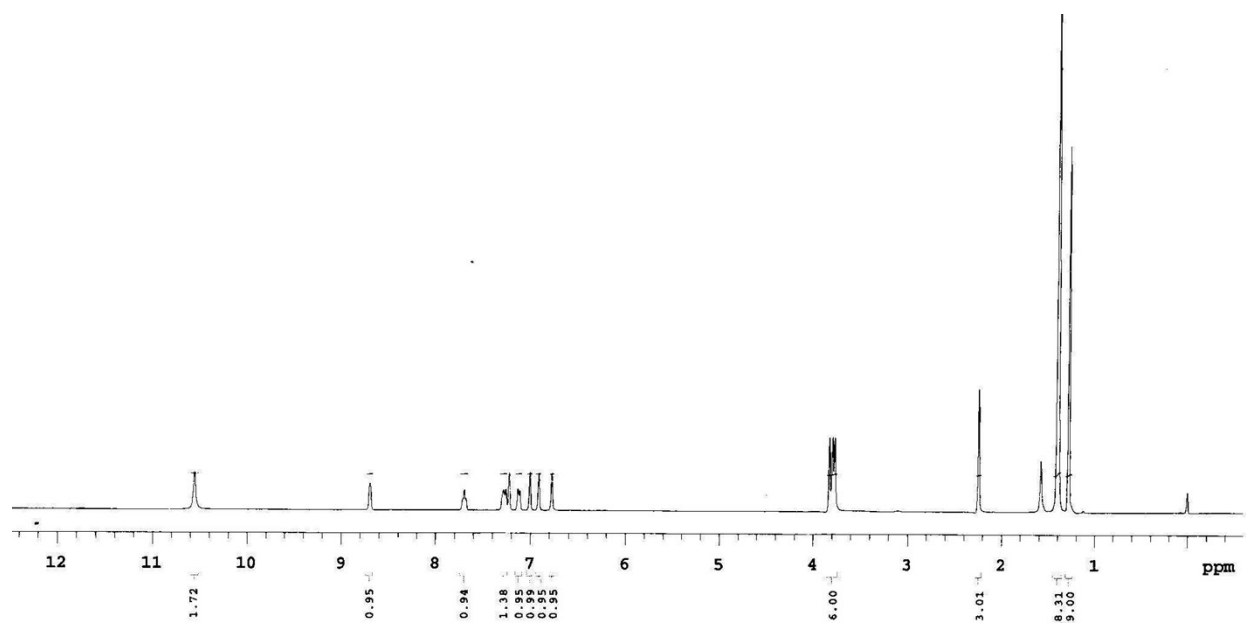

**Figure S14:**  $^1\text{H-NMR}$  spectrum of ligand  $\text{L}^2\text{H}_2$  in  $\text{CDCl}_3$ .

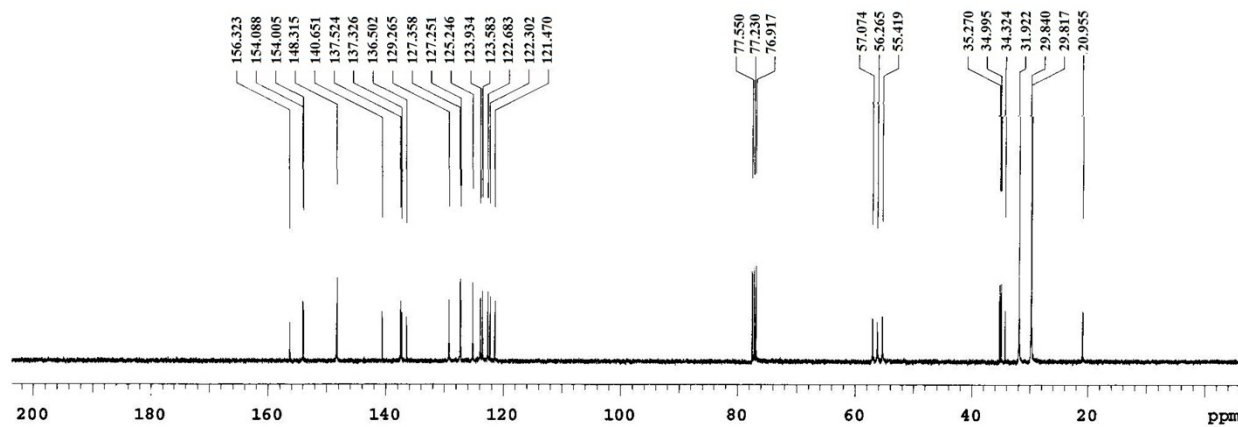

**Figure S15:**  $^{13}\text{C-NMR}$  spectrum of ligand  $\text{L}^2\text{H}_2$  in  $\text{CDCl}_3$ .

|               |       |             |        |                 |              |                        |                      |
|---------------|-------|-------------|--------|-----------------|--------------|------------------------|----------------------|
| Sample Name   | L-2   | Position    | Vial 1 | Instrument Name | Instrument 1 | User Name              |                      |
| Inj Vol       | -10   | InjPosition |        | SampleType      | Sample       | IRM Calibration Status | Success              |
| Data Filename | L-2.d | ACQ Method  |        | Comment         |              | Acquired Time          | 12/9/2014 3:34:49 PM |

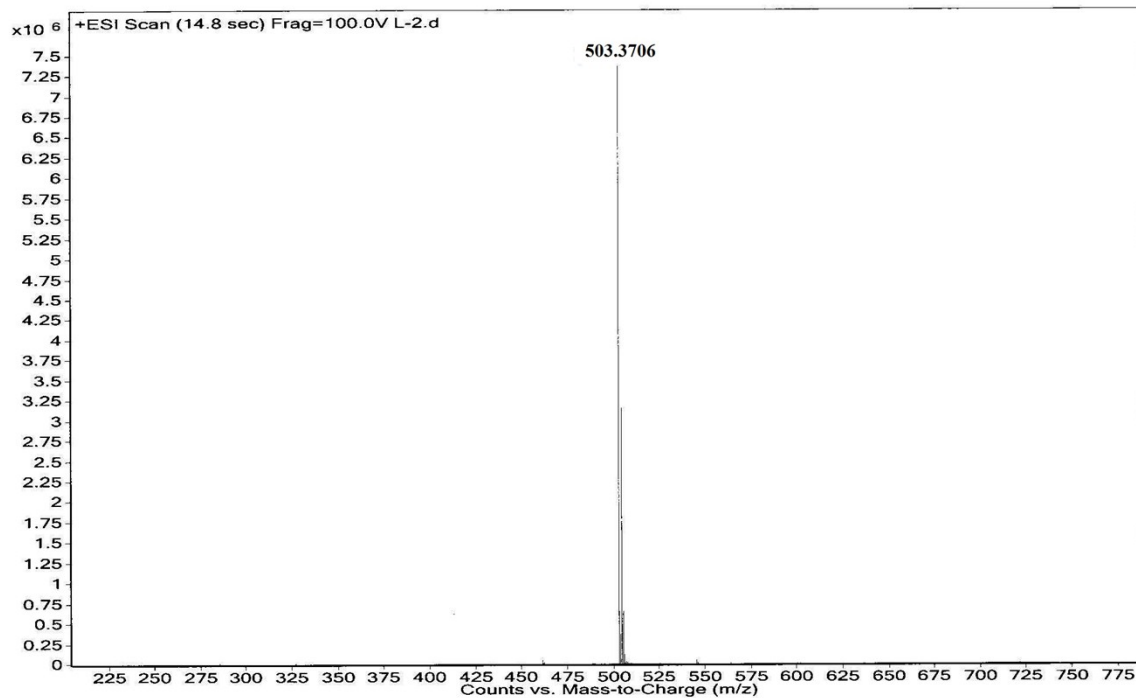

Figure S16: ESI mass spectrum of ligand  $L^2H_2$  in methanol.

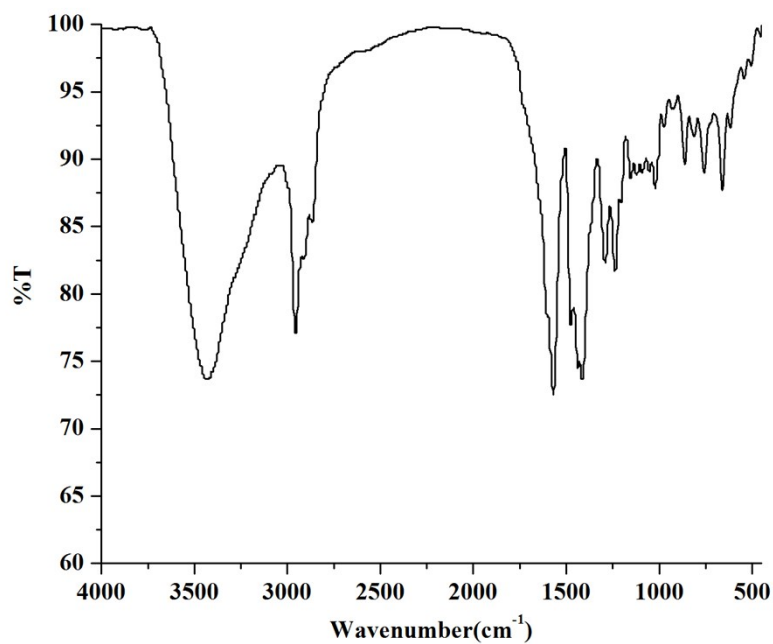

Figure S17: FT-IR spectrum of complex **2** in KBr pellet.

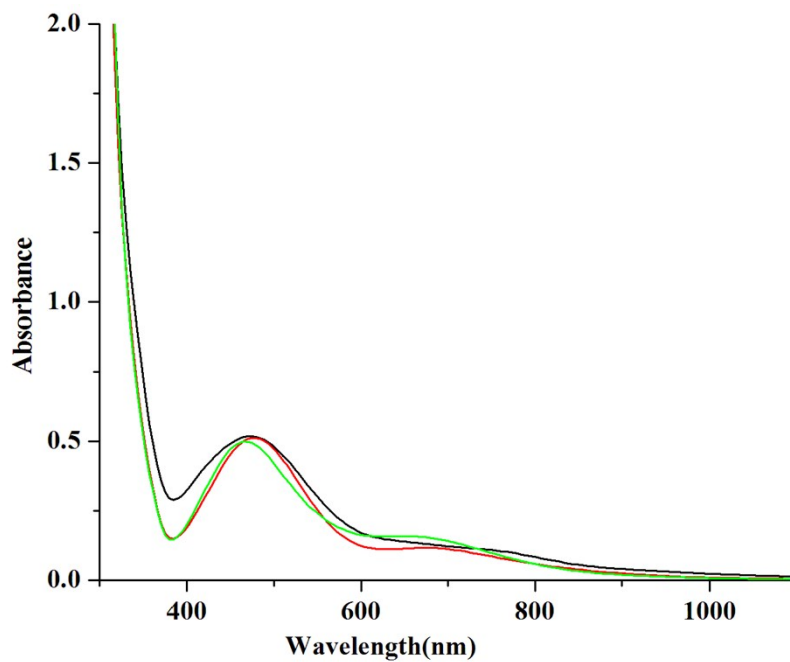

**Figure S18:** UV-visible spectra of complex **2** in different solvents.

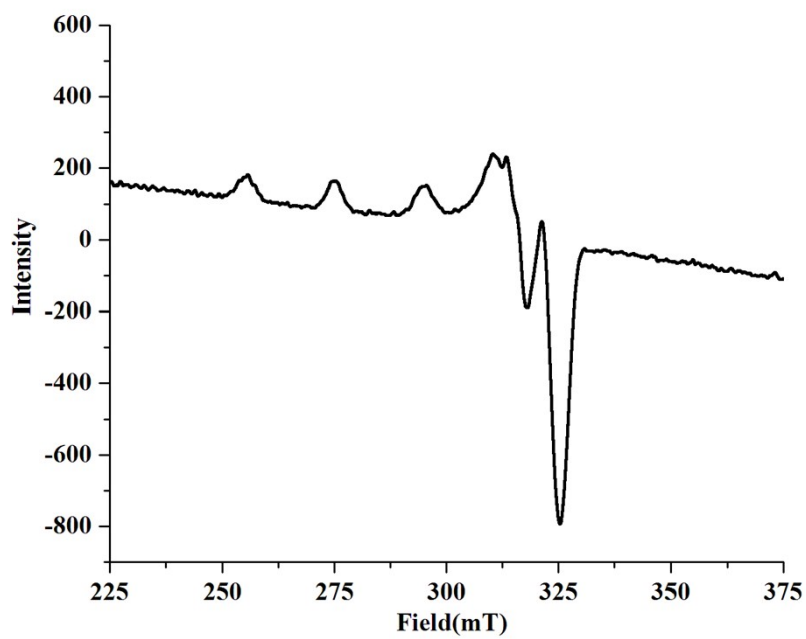

**Figure S19:** X-Band EPR spectrum of complex **2** in THF at 77 K.

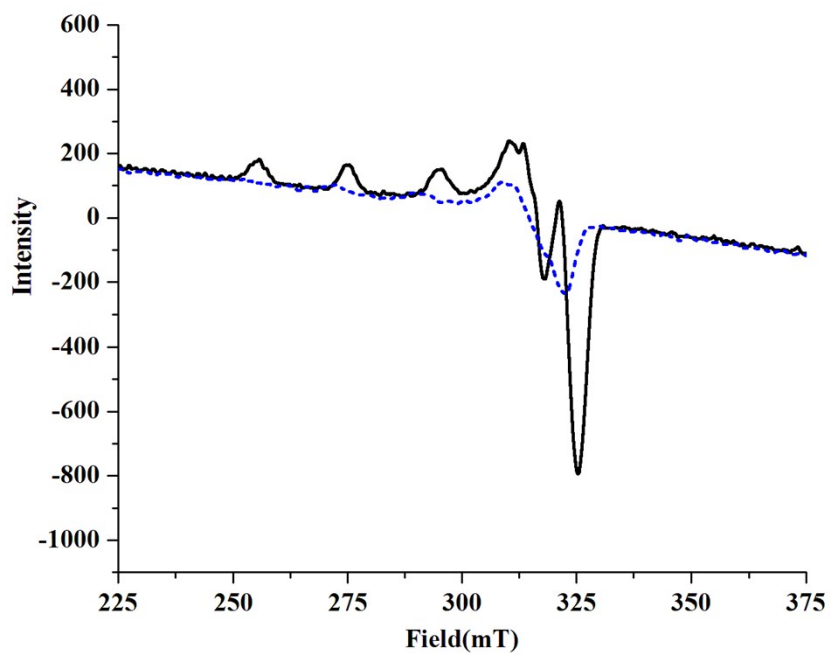

**Figure S20:** X-Band EPR spectrum of complex **2** (black trace) and phenoxyl radical intermediate (blue trace) in THF at 77 K.

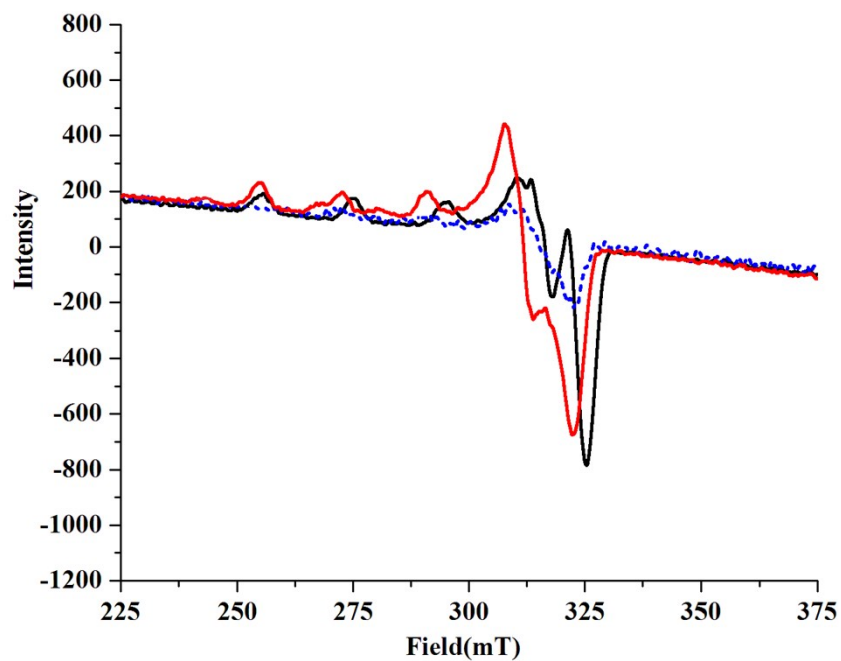

**Figure S21:** X-Band EPR spectrum of complex **2** (black trace), phenoxyl radical intermediate (blue trace) and complex **4** (red trace) in THF at 77 K.

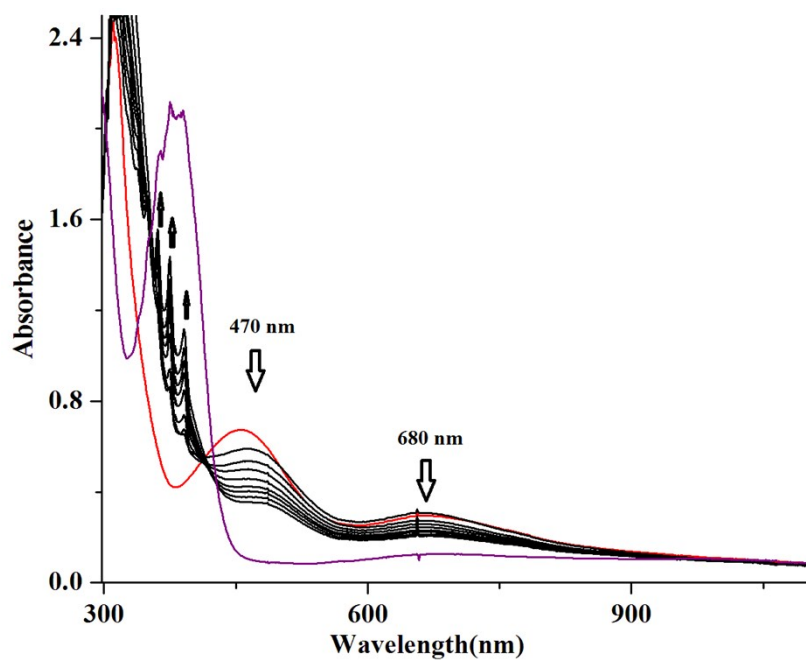

**Figure S22:** UV-visible spectra of complex **2** (red trace), phenoxyl radical (black traces) and final decomposition product (violet trace) in THF at -80 °C.

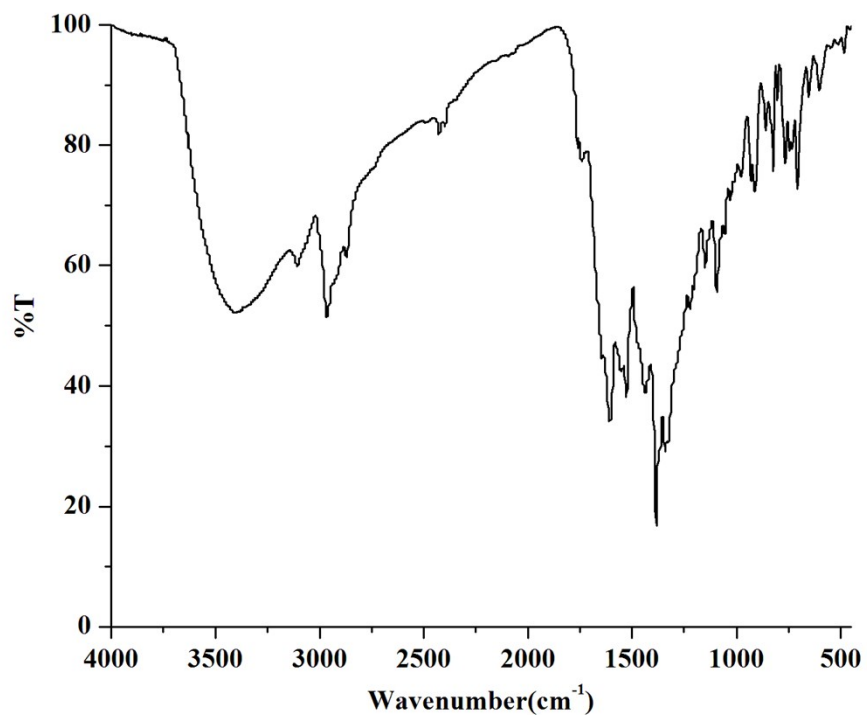

**Figure S23:** FT-IR spectrum of complex **4** in KBr pellet.

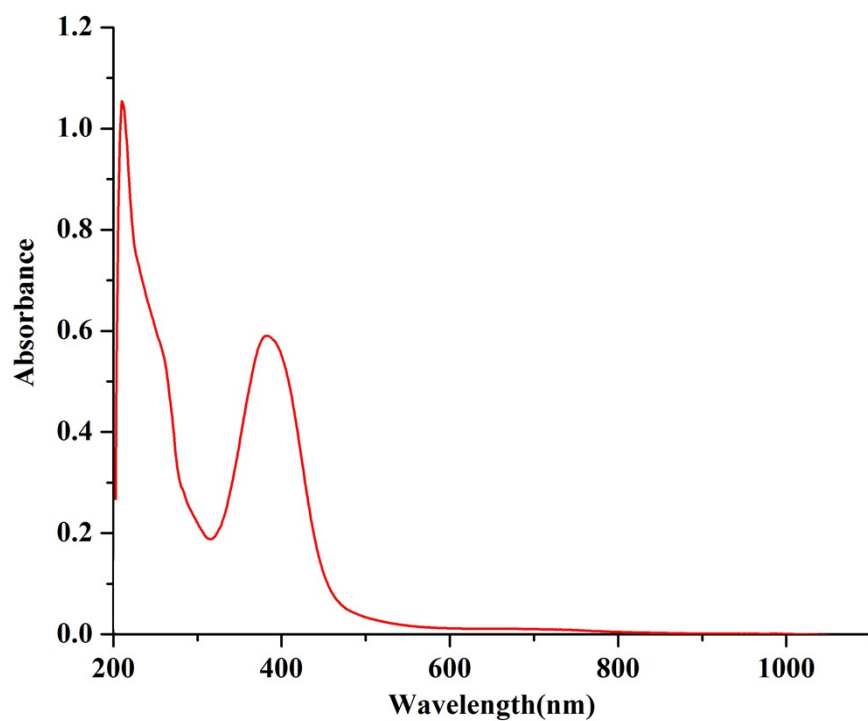

**Figure S24:** UV-visible spectrum of complex **4** in methanol at room temperature.

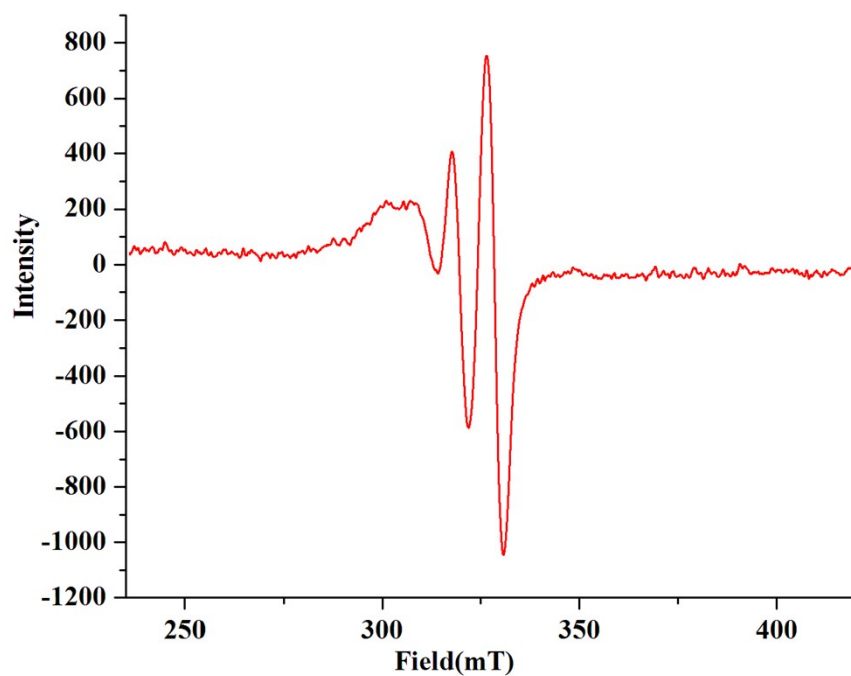

**Figure S25:** X-Band EPR spectrum of complex **4** in methanol at room temperature.



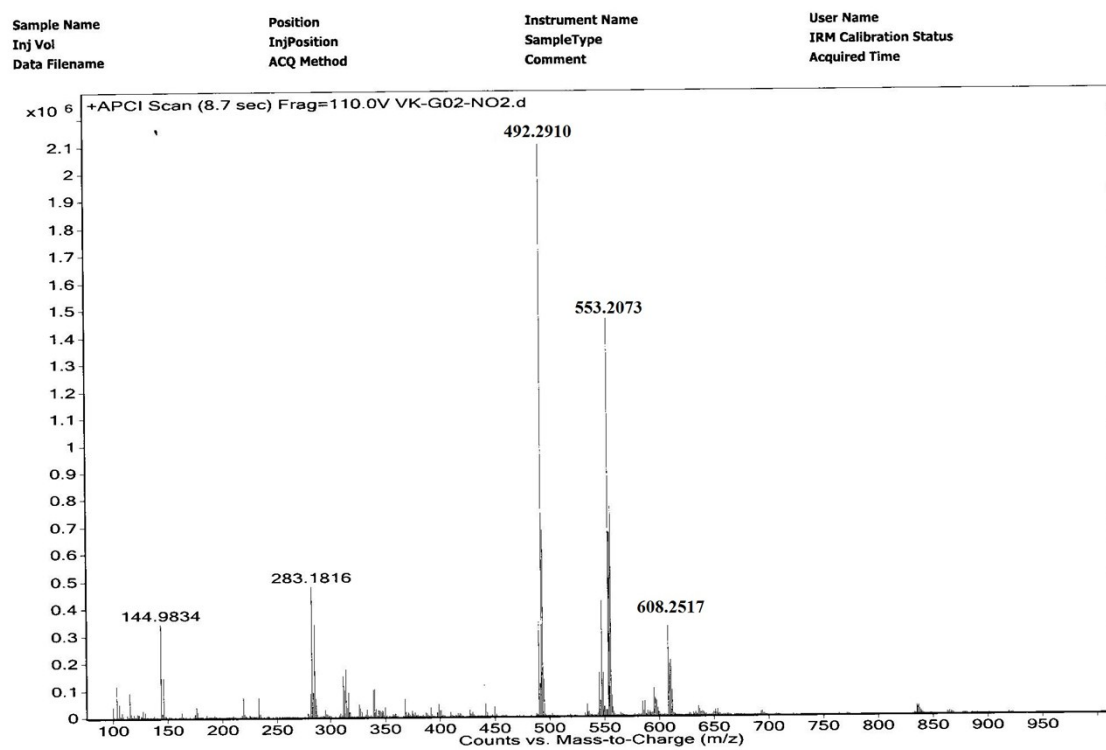

Figure S26: ESI mass spectrum of complex 4 in methanol.

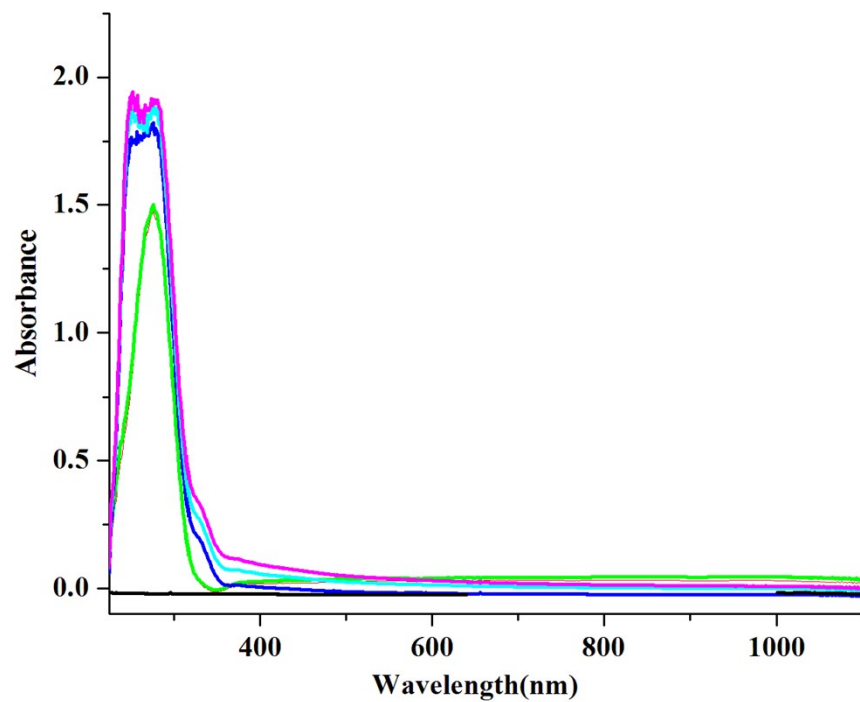

Figure S27: UV-visible spectra of NO<sub>2</sub> purged in THF at -80 °C at various time after purging.

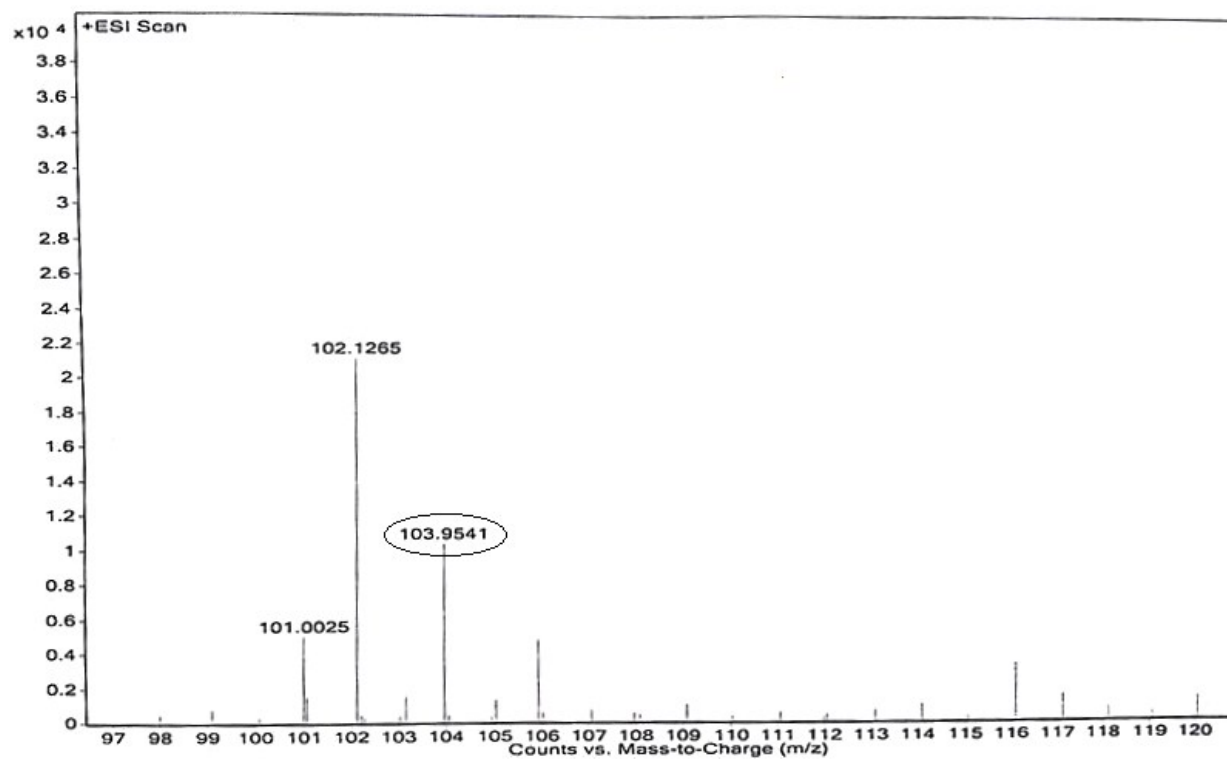

**Figure S28:** ESI-Mass of  $(\text{CH}_3)_3\text{NO}_2$  from the reaction of complex **1** with  $\text{NO}_2$ .

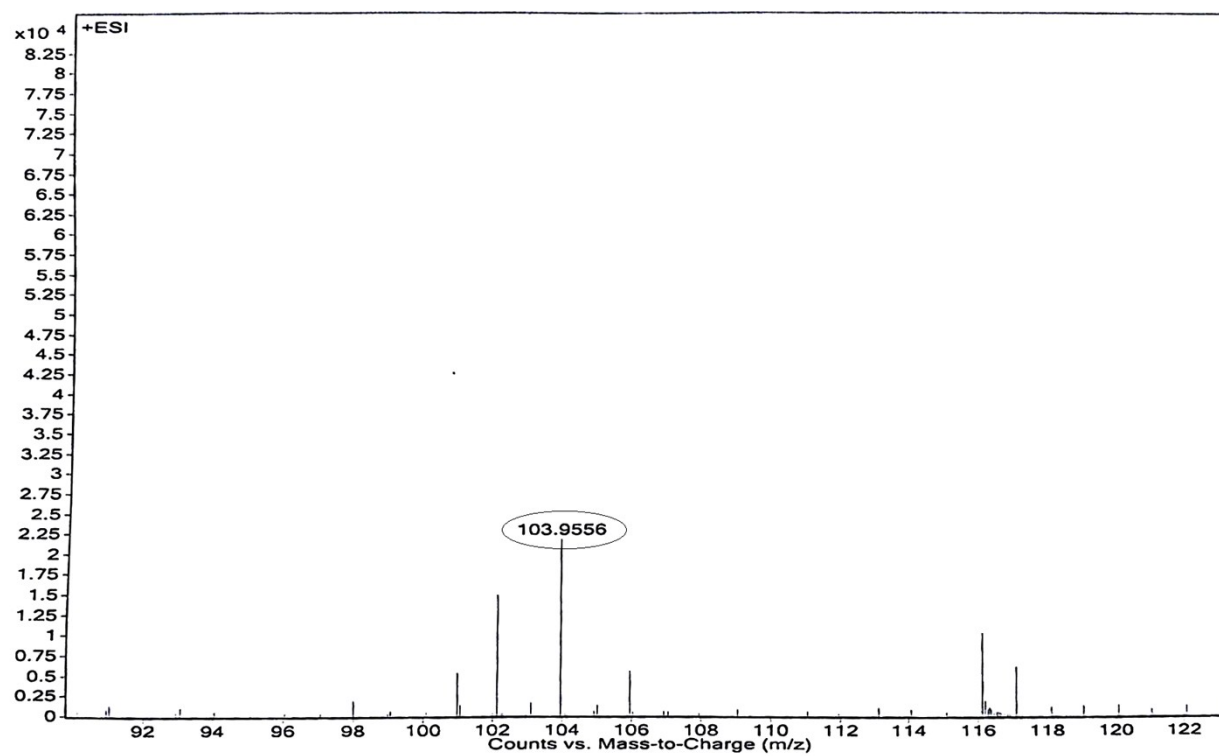

**Figure S29:** ESI-Mass of  $(\text{CH}_3)_3\text{NO}_2$  from the reaction of complex **2** with  $\text{NO}_2$ .
